# Supplementary material for: Ultrasonic-assisted solution-phase synthesis of gadolinium benzene-1,4-dicarboxylate hierarchical architectures and their solid-state thermal transformation
Source: Royal Society of Chemistry journal article supplement (doi:10.1039/c2ce25075f), 2012-01-01
Supplement: c2ce25075f.pdf [file c2ce25075f.pdf]

*Electronic Supplementary Information (ESI)*

**Ultrasonic-assisted solution-phase synthesis of gadolinium benzene-1,4-dicarboxylate hierarchical architectures and its solid-state thermal transformation†**

**Li-Na Jin, Qing Liu, Yi Lu, Wei-Yin Sun\***

*Coordination Chemistry Institute, State Key Laboratory of Coordination Chemistry, School of Chemistry and Chemical Engineering, Nanjing National Laboratory of Microstructures, Nanjing University, Nanjing 210093, China. E-mail: [sunwy@nju.edu.cn](mailto:sunwy@nju.edu.cn); Fax: +86 25 83314502*

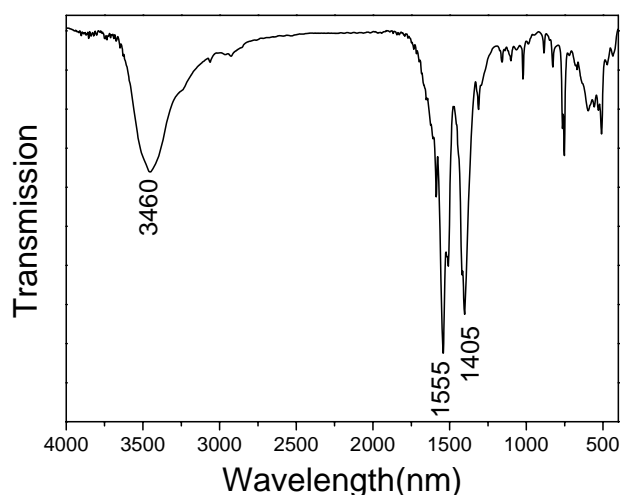

**Figure S1.** FT-IR spectrum of the as-obtained [Gd(1,4-BDC)<sub>1.5</sub>(H<sub>2</sub>O)<sub>2</sub>].

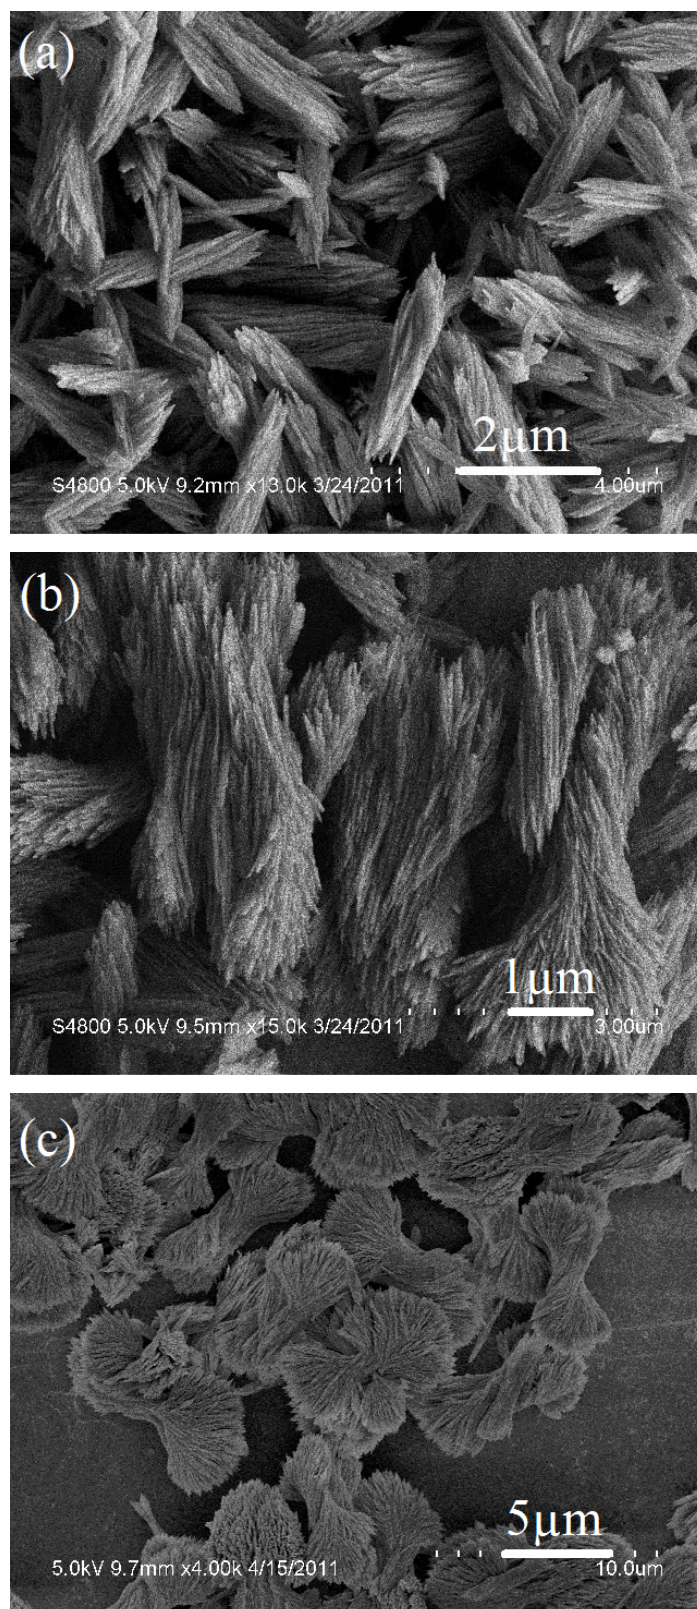

**Figure S2.** SEM images of the products prepared from the system for different times: (a) 5, (b) 10 and (c) 30 min.

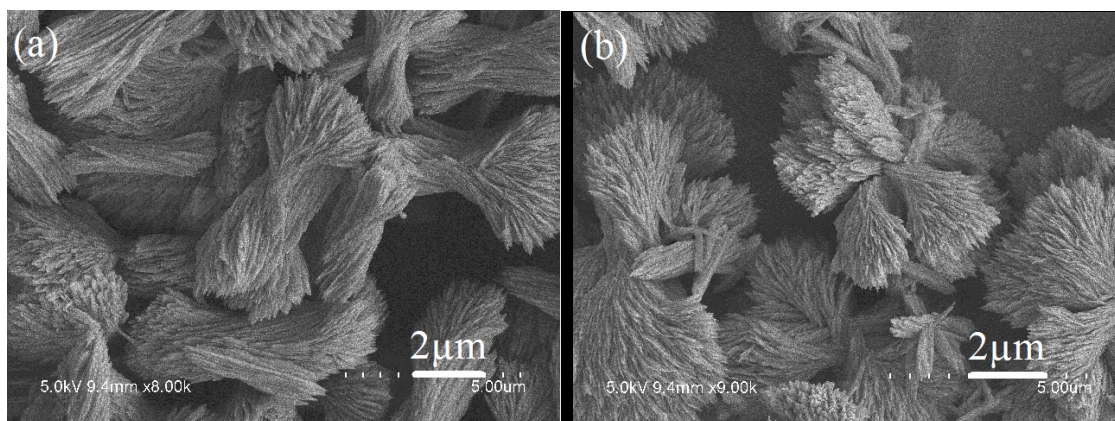

**Figure S3.** SEM images of the Ln<sup>3+</sup>-doped Gd(BDC)<sub>1.5</sub>(H<sub>2</sub>O)<sub>2</sub> straw-sheaf-like architectures: (a) Gd(BDC)<sub>1.5</sub>(H<sub>2</sub>O)<sub>2</sub>: 5% Eu<sup>3+</sup>, (b) Gd(BDC)<sub>1.5</sub>(H<sub>2</sub>O)<sub>2</sub>: 5% Tb<sup>3+</sup>.

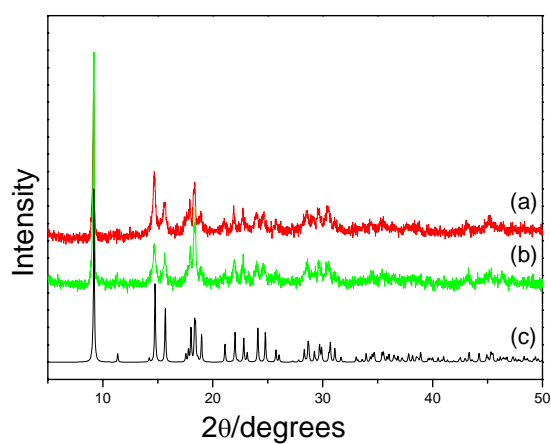

**Figure S4.** XRD patterns of the samples: (a) Gd(BDC)<sub>1.5</sub>(H<sub>2</sub>O)<sub>2</sub>: 5% Eu<sup>3+</sup>, (b) Gd(BDC)<sub>1.5</sub>(H<sub>2</sub>O)<sub>2</sub>: 5% Tb<sup>3+</sup>, (c) simulated XRD pattern using the X-ray structure of Tb(BDC)<sub>1.5</sub>(H<sub>2</sub>O)<sub>2</sub> single crystal.
